# Supplementary material for: The volatile emission of Eurosta solidaginis primes herbivore-induced volatile production in Solidago altissima and does not directly deter insect feeding
Source: PubMed Central journal article supplement (PMC4071026; doi:10.1186/1471-2229-14-173), 2014-06-19

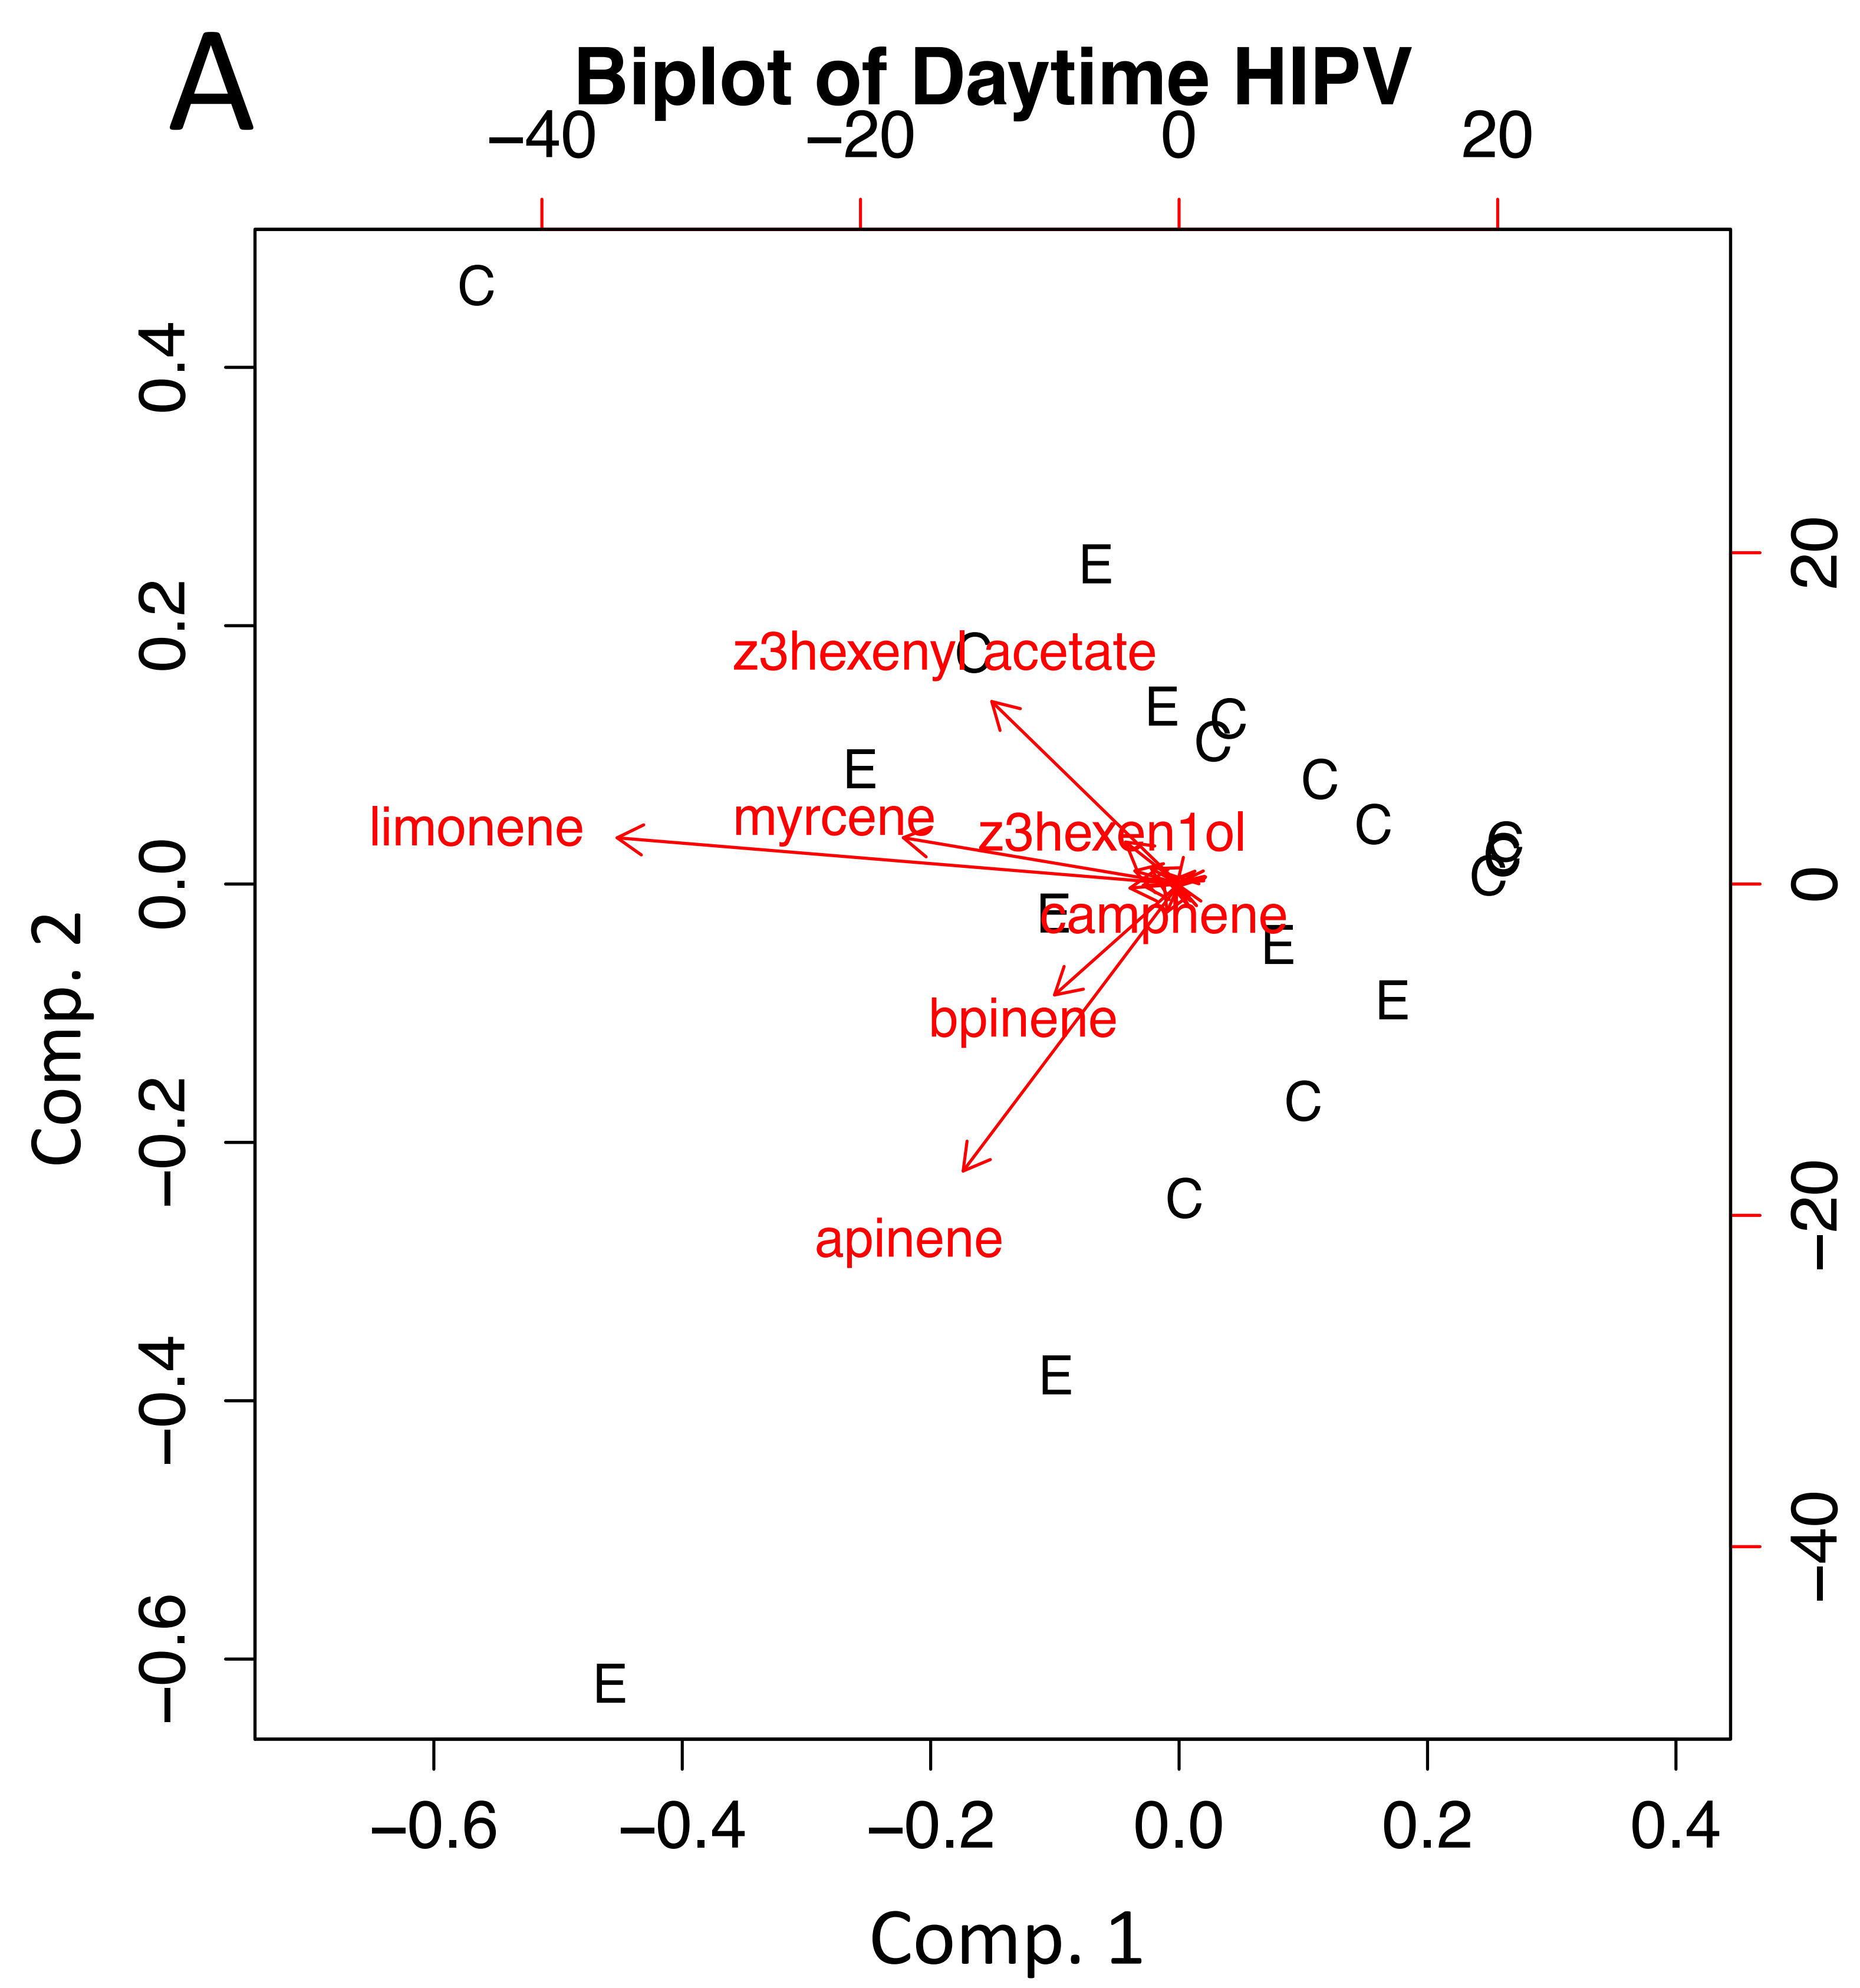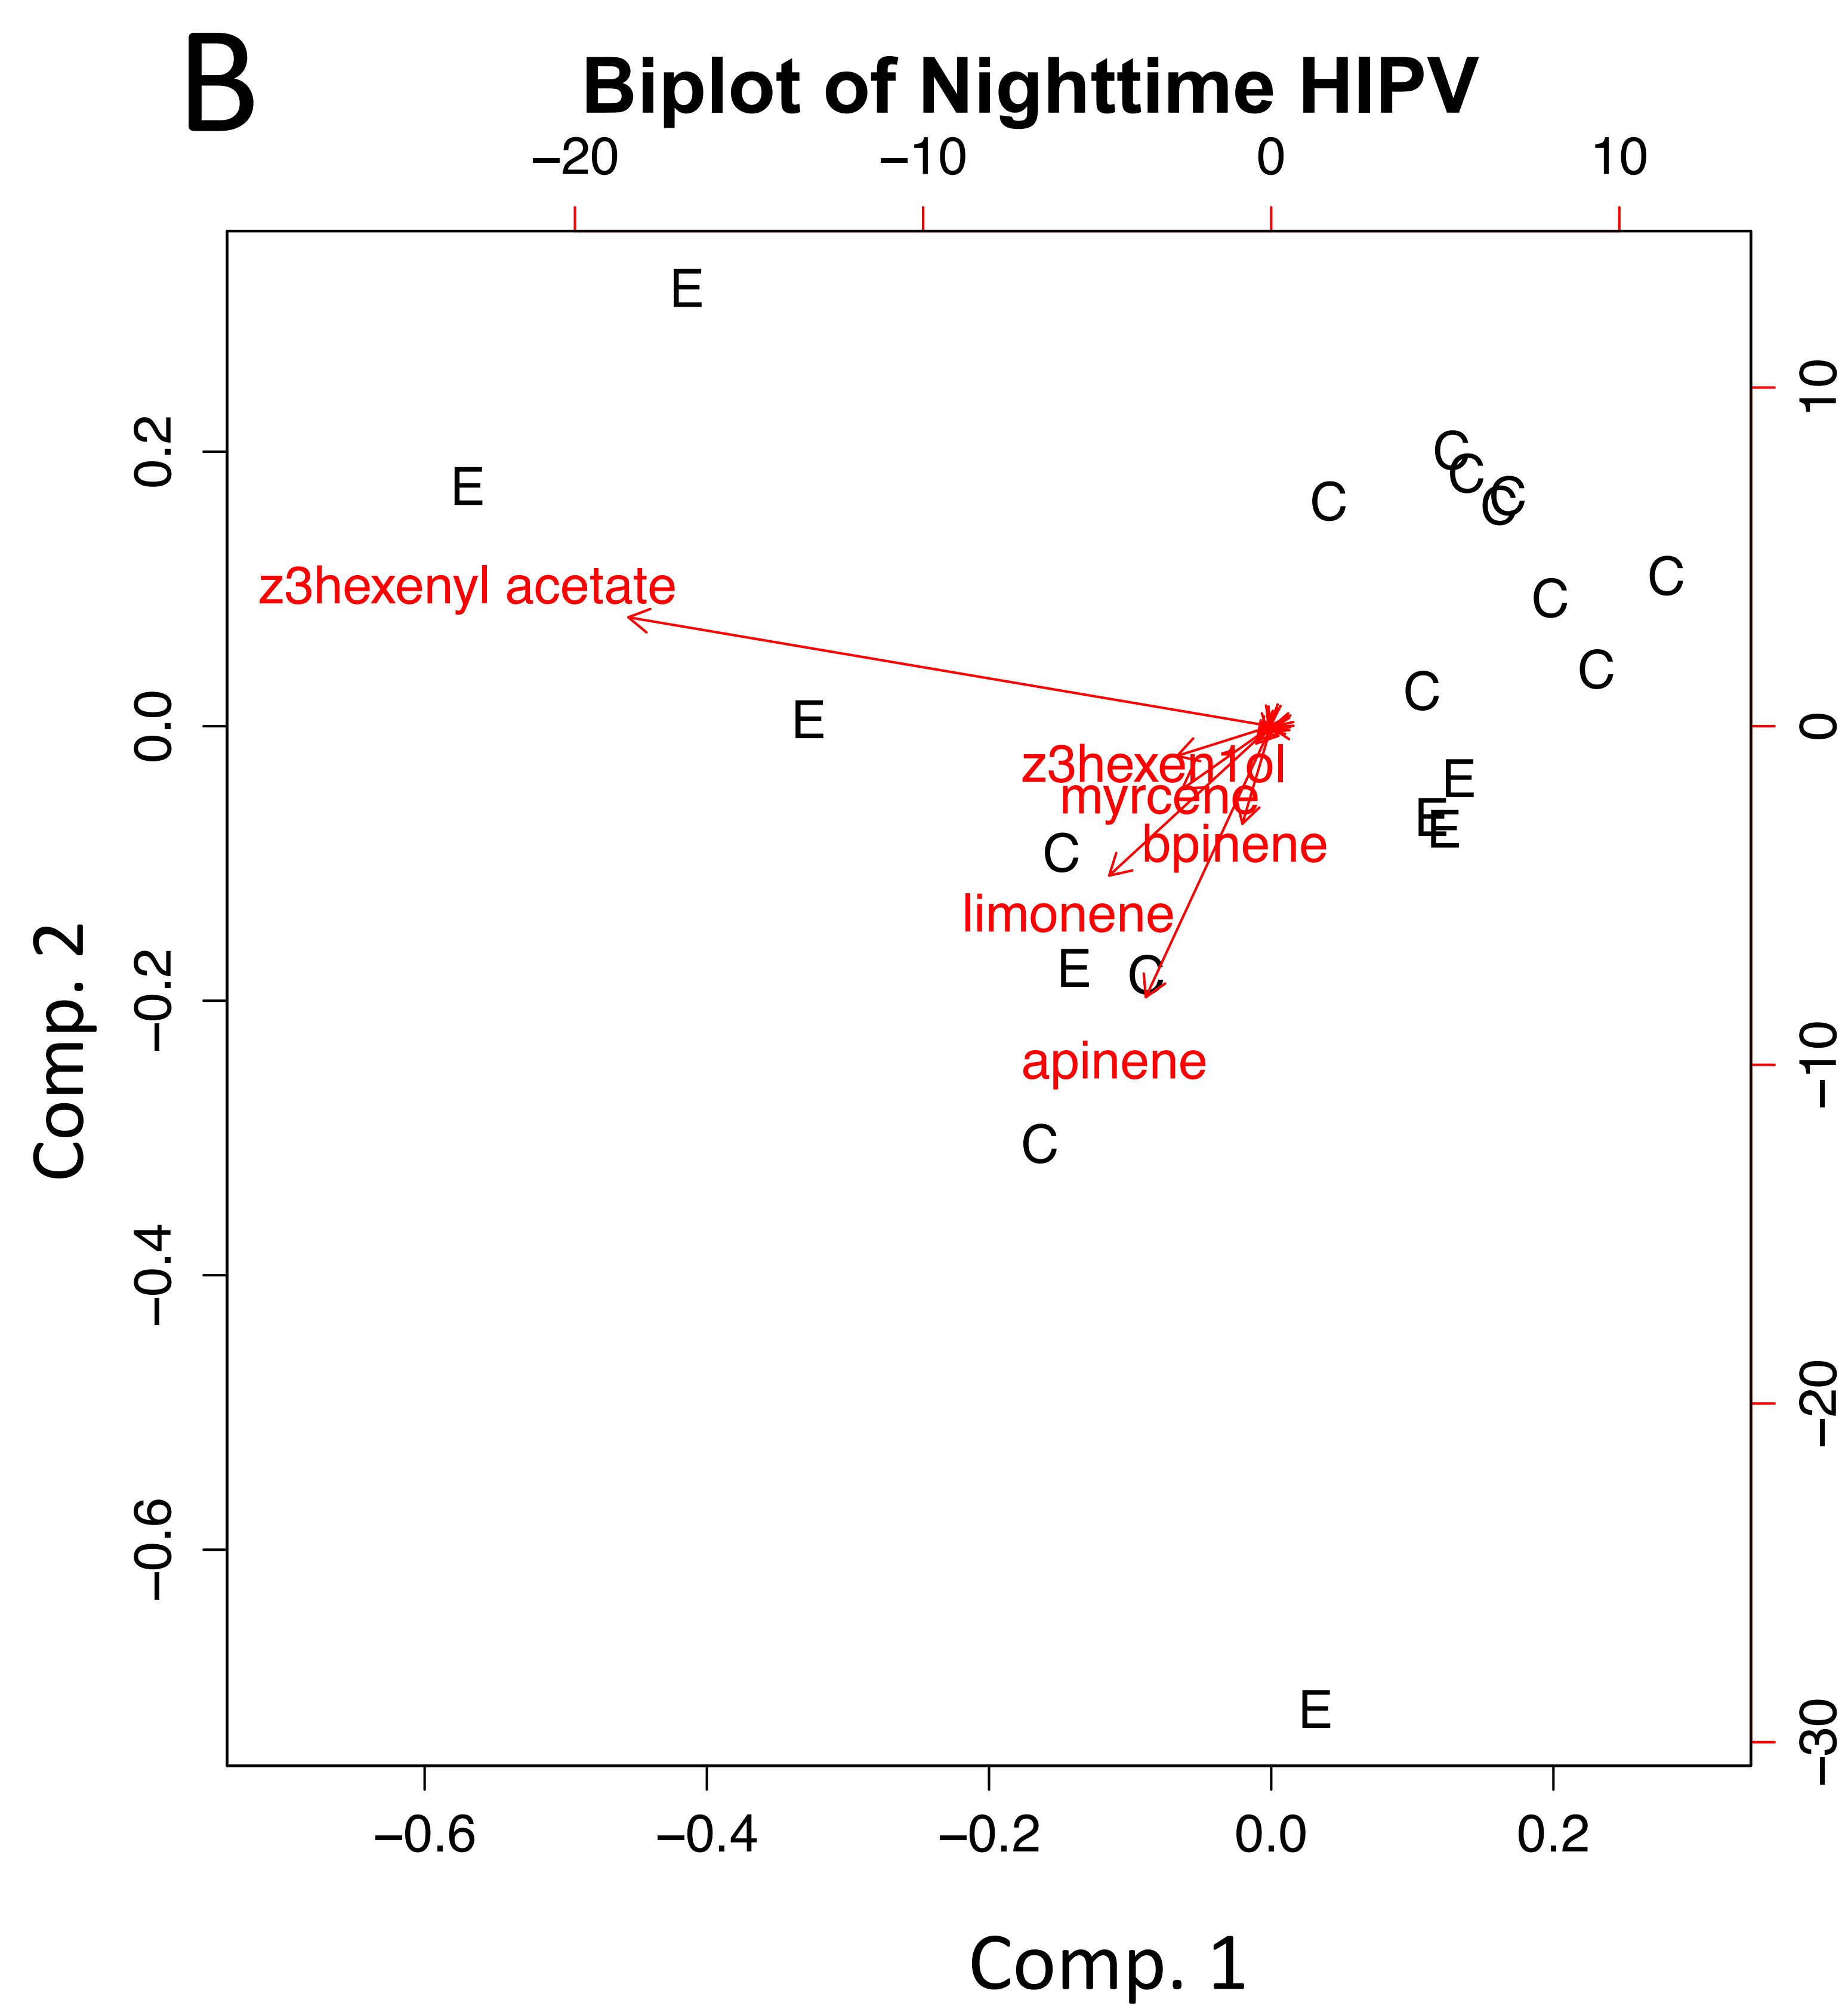

Supplement: 1471-2229-14-173-S2.pdf [file 1471-2229-14-173-S2.pdf]
